# Supplementary material for: Optimal composition and position of histidine-containing tags improves biodistribution of 99mTc-labeled DARPin G3
Source: PubMed Central journal article supplement (PMC6599047; doi:10.1038/s41598-019-45795-8), 2019-06-28
Supplement: 41598_2019_45795_MOESM1_ESM.pdf [file 41598_2019_45795_MOESM1_ESM.pdf]

## **Supplementary Information**

### **Optimal composition and position of histidine-containing tags improves biodistribution of <sup>99m</sup>Tc-labeled DARPin G3**

Anzhelika Vorobyeva, Alexey Schulga, Elena Konovalova, Rezan Güler, John Löfblom, Mattias Sandström, Javad Garousi, Vladimir Chernov, Olga Bragina, Anna Orlova, Vladimir Tolmachev, Sergey M. Deyev,

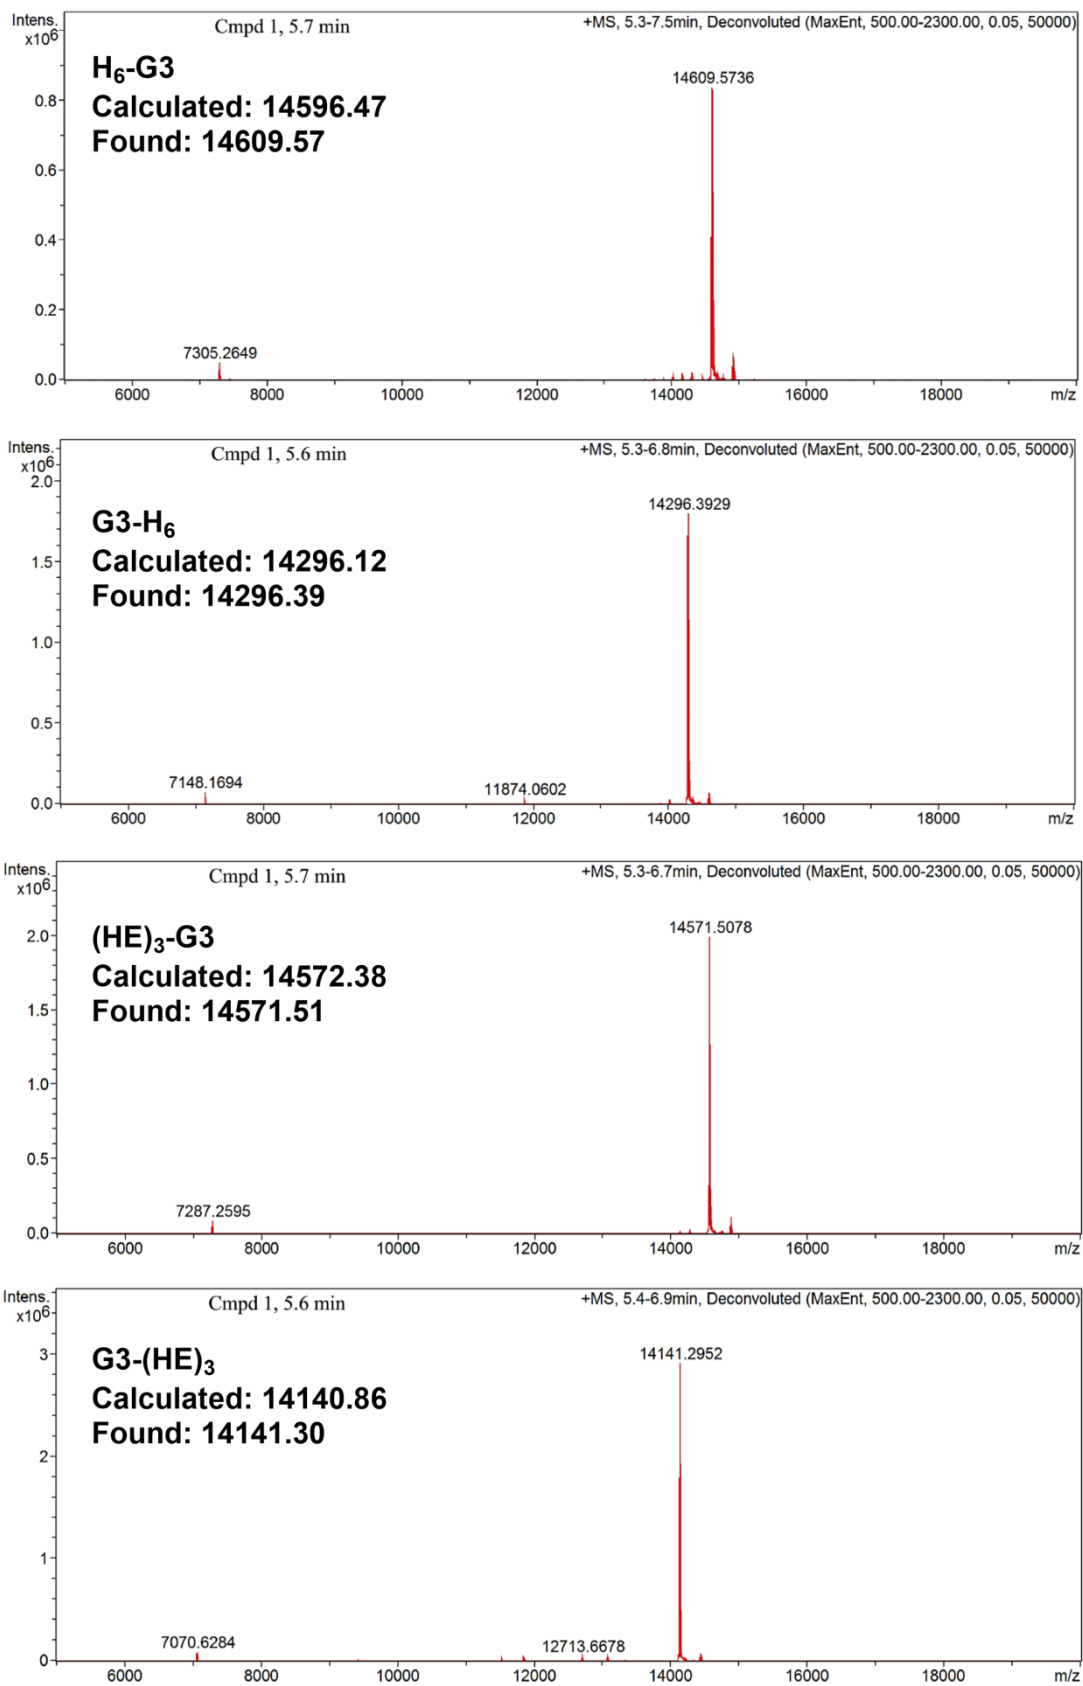

SI Figure 1. ESI-MS analysis of G3 variants.

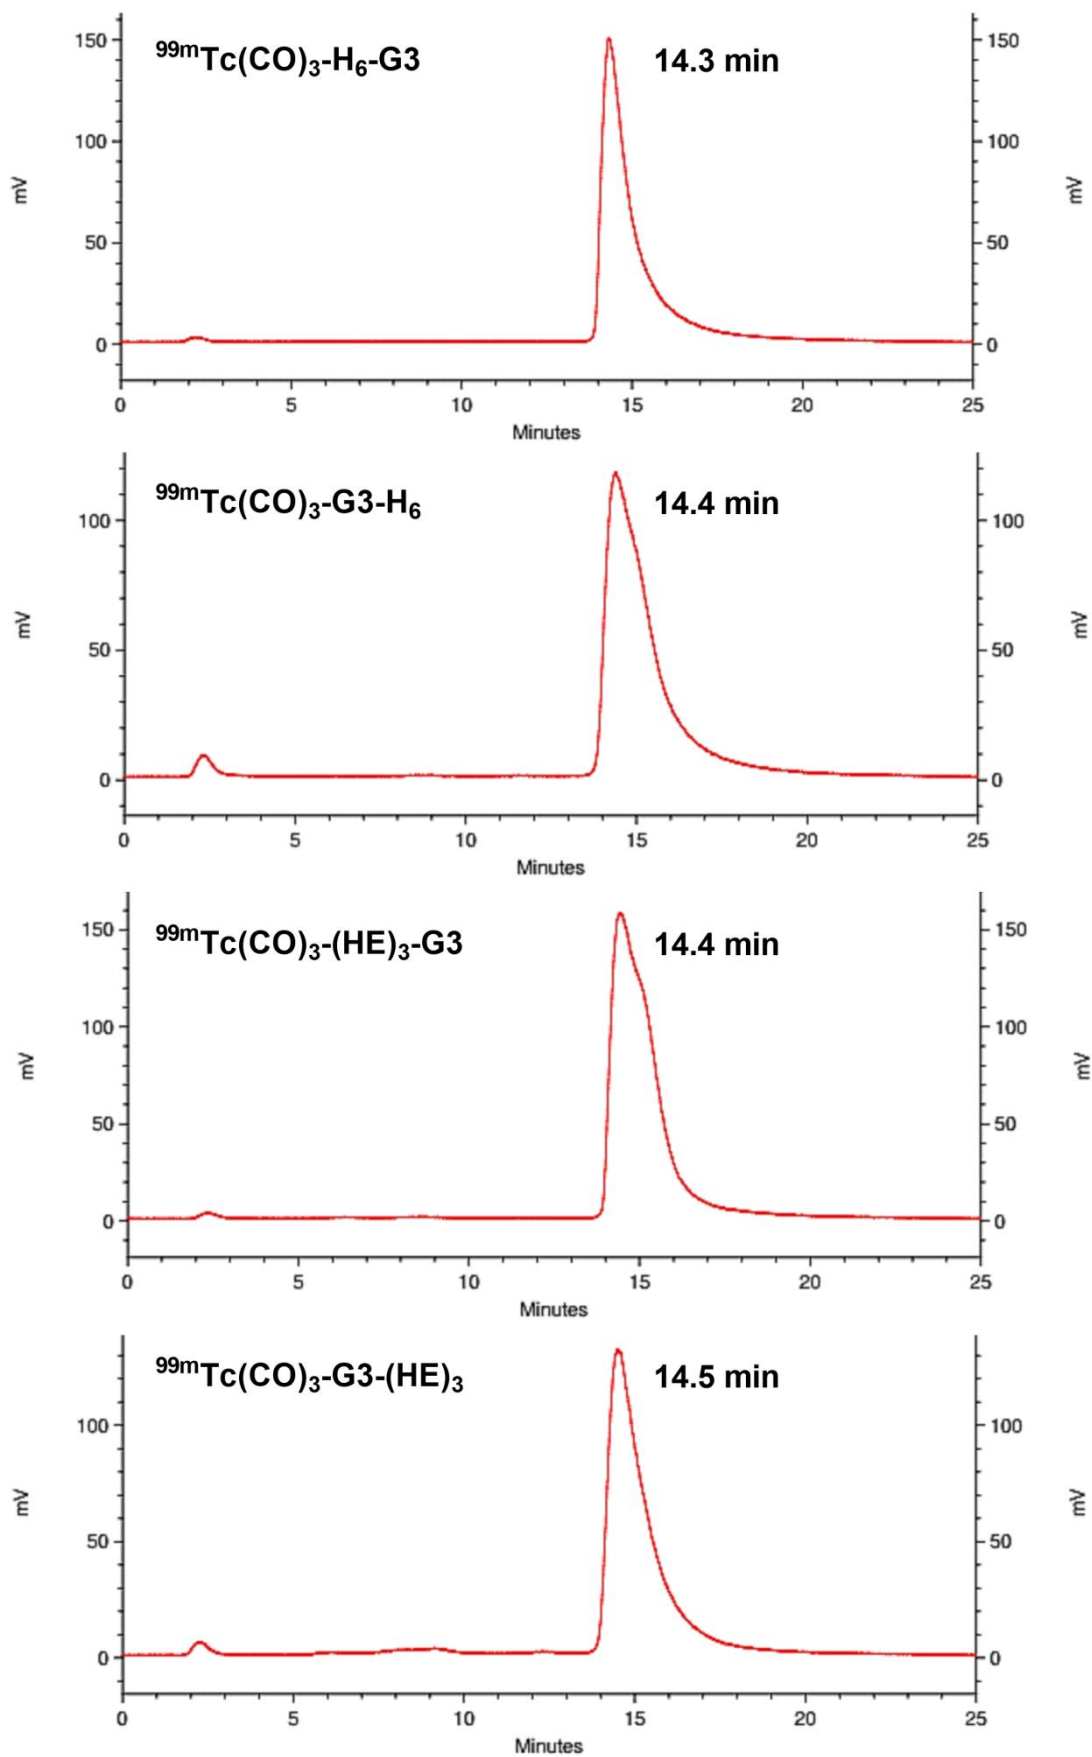

**SI Figure 2.** Radio-HPLC analysis of  $^{99m}\text{Tc}$ -labeled G3 variants. Retention time of the major peak (in mins) is shown.
